# Supplementary material for: Antisense oligonucleotide therapy corrects splicing in the common Stargardt disease type 1-causing variant ABCA4 c.5461-10T>C
Source: PubMed Central journal article supplement (PMC9999166; doi:10.1016/j.omtn.2023.02.020), 2023-02-18
Supplement: mmc1.pdf [file mmc1.pdf]

**Supplemental information**

**Antisense oligonucleotide therapy corrects  
splicing in the common Stargardt disease  
type 1-causing variant *ABCA4* c.5461-10T>C**

**Melita Kaltak, Petra de Bruijn, Davide Piccolo, Sang-Eun Lee, Kalyan Dulla, Thomas Hoogenboezem, Wouter Beumer, Andrew R. Webster, Rob W.J. Collin, Michael E. Cheetham, Gerard Platenburg, and Jim Swildens**

**Table S1.** Sequences of antisense oligonucleotides used in the study.

| AON Name | AON sequence                      |
|----------|-----------------------------------|
| AON1     | 5'-CUCACAGGACAGCACAGGGCAA-3'      |
| AON2     | 5'-CAGCAGGUGGGGCCAGAUAGCU-3'      |
| AON3     | 5'-CAAACCCACCCCCCUCUCUU-3'        |
| AON4     | 5'-GUAGGACUGUUGGAAACGGGG-3'       |
| AON5     | 5'-AGCGUCUGAAACAGGGAA-3'          |
| AON6     | 5'-GAACCUAGAGCAGCGUCUGAAA-3'      |
| AON7     | 5'-UGAGCAGCUUCCUCAGCACGG-3'       |
| AON8     | 5'-CCCAGGCAGAAGUGGGGAAG-3'        |
| AON9     | 5'-GUGCAAGGUCAAUGAGGCCCC-3'       |
| AON10    | 5'-CAAACCGGGCAUAGACAUCU-3'        |
| AON11    | 5'-CUCGGCUACCACCCACCAAACC-3'      |
| AON12    | 5'-CCCAGGGCCCAUGCUCUCCAUAGGGC-3'  |
| AON13    | 5'-GUAACCCUCCCAGCUUUGGA-3'        |
| AON14    | 5'-GAGCCCCCGGUAACCCUCCCA-3'       |
| AON15    | 5'-AGCACCAGCCCUGCCACAGUC-3'       |
| AON16    | 5'-UGCCACAGUCUGAUGCAGGAGCC-3'     |
| AON17    | 5'-CCAGAUGCUCUCACAGGACAGCA-3'     |
| AON18    | 5'-GGUGGGGCCAGAUAGCUCUCACA-3'     |
| AON20    | 5'-CCCCUCUCUUCAGCAGGUGGGG-3'      |
| AON21    | 5'-CCCACCCCCCUCUCUUCAGCA-3'       |
| AON23    | 5'-CAGGGAAGUAGGACUGUUGGAAAC-3'    |
| AON24    | 5'-GCAGCGUCUGAAACAGGGAAGUAGG-3'   |
| AON25    | 5'-GUUGAACCUAGAGCAGCGUCUGAA-3'    |
| AON26    | 5'-GGGAAGACAAUGAGCAGCUUCCU-3'     |
| AON27    | 5'-AGGCCCGGCCAGGCAGAAGUG-3'       |
| AON28    | 5'-GCCUGGCUCAGUGCAAGGUCAAU-3'     |
| AON29    | 5'-ACCACCCACCAAACCGGGCAUAGA-3'    |
| AON31    | 5'-UGCUCUCCAUAGGGCCUCGGCUACCA-3'  |
| AON32    | 5'-GGGCCCAUGCUCUCCAUAGGGCCUCGG-3' |
| AON44    | 5'-AUGCUCUCCAUAGGGCCUCGG-3'       |
| AON59    | 5'-GCUCCAUAGGGCCUCGG-3'           |
| AON60    | 5'-UGCUCUCCAUAGGGCCUCGG-3'        |

**Table S2.** The Excel file “Table S2” contains Splicing Silencer motifs detected in the AON binding region shown in Figure S1B. Capital letters are representing the *ABCA4* exon 39 sequence.

**Table S3.** Multiple unpaired t-test to identify significant differences in expression of genes between wild-type and homozygous c.5461-10T>C ROs at their age of 120 days, graphically displayed in Figure 3B.

|              | Discovery? | P value  | Mean of<br><i>ABCA4</i><br>c.5461-<br>10T>C | Mean of<br>Wild-<br>type | Difference | SE of<br>difference | t ratio | df | q value  |
|--------------|------------|----------|---------------------------------------------|--------------------------|------------|---------------------|---------|----|----------|
| <i>USH2A</i> | No         | 0,191852 | 863,7                                       | 1048                     | -184,7     | 125,6               | 1,47    | 6  | 0,258361 |
| <i>CRX</i>   | No         | 0,167121 | 12759                                       | 8140                     | 4619       | 2939                | 1,572   | 6  | 0,258361 |
| <i>NRL</i>   | No         | 0,346678 | 5772                                        | 3171                     | 2601       | 2547                | 1,021   | 6  | 0,350145 |
| <i>NR2E3</i> | No         | 0,633145 | 652,7                                       | 744,3                    | -91,63     | 182,3               | 0,5026  | 6  | 0,511582 |
| <i>ABCA4</i> | Yes        | 0,000764 | 234,4                                       | 821                      | -586,7     | 93,56               | 6,27    | 6  | 0,003089 |

**Table S4.** *In silico* analysis of possible intergenic and intronic off-targets with 2 mismatches in QR-1011.

| <b>Gene</b>    | <b>Matched bases</b> | <b>Distance to 5' exon</b> | <b>Distance to 3' exon</b> |
|----------------|----------------------|----------------------------|----------------------------|
| <i>TEAD1</i>   | 16/18                | 17 749                     | 1 046                      |
| <i>CARD19</i>  | 16/18                | -                          | 9 737                      |
| <i>MIPOL1</i>  | 16/18                | 79 078                     | 44 919                     |
| <i>CAPN14</i>  | 16/18                | -                          | 3 437                      |
| <i>DDP4</i>    | 16/18                | 4 033                      | 25 850                     |
| <i>TWIST2</i>  | 16/18                | 35 943                     | 25 182                     |
| <i>ROBO2</i>   | 16/18                | 369 388                    | 9 934                      |
| <i>PSD3</i>    | 16/18                | -                          | 47 376                     |
| <i>DLGAP2</i>  | 16/18                | 304 389                    | 46 477                     |
| <i>GALNT9</i>  | 16/18                | 7 285                      | 36 930                     |
| <i>CRAMP1</i>  | 16/18                | 3 515                      | 2 521                      |
| <i>ATXN7L1</i> | 16/18                | 111 405                    | 11 901                     |
| <i>RNF111</i>  | 16/18                | -                          | 8 938                      |
| <i>GRIN2A</i>  | 16/18                | 36 263                     | 10 583                     |
| <i>TLL11</i>   | 16/18                | 51 605                     | 5 658                      |
| <i>PPP1R26</i> | 16/18                | -                          | 225                        |
| <i>FCGBP</i>   | 16/18                | 695                        | 780                        |
| <i>LIMS1</i>   | 16/18                | 4 115                      | 22 717                     |
| <i>PXYLP1</i>  | 16/18                | 6 036                      | 12 029                     |
| <i>GET4</i>    | 16/18                | 1 161                      | 2 229                      |
| <i>GRB2</i>    | 16/18                | 5 195                      | 55 539                     |

**Table S5.** Raw data obtained after analysis of Western Blots with protein lysates shown in Figure 5B and Figure S6. The protein signal was relatively quantified using ImageJ image analysis software.

| Lane | Sample          | Protein mass (µg) | Signal (area) |         | Signal x protein mass |         | Mean WT signal |         | Factor |     | ABCA4/VCL |
|------|-----------------|-------------------|---------------|---------|-----------------------|---------|----------------|---------|--------|-----|-----------|
|      |                 |                   | ABCA4         | VCL     | ABCA4                 | VCL     | ABCA4          | VCL     | ABCA4  | VCL |           |
| 1    | STGD1 untreated | 85                | 0             | 16986.3 | 0                     | 17985.5 | 40444.7        | 35140.4 | 0      | 0.5 | 0         |
| 2    | STGD1 scrambled | 85                | 0             | 22529   | 0                     | 23854.2 |                |         | 0      | 0.7 | 0         |
| 3    | STGD1 QR-1011   | 85                | 15010.6       | 32891   | 15893.6               | 34825.8 |                |         | 0.4    | 1   | 0.4       |
| 4    | Wild-type       | 90                | 47863.2       | 39606.7 | 47863.2               | 39606.7 |                |         | 1.2    | 1.1 | 1.1       |
| 5    | Wild-type       | 45                | 21372.8       | 17743.2 | 42745.5               | 35486.5 |                |         | 1.1    | 1   | 1.1       |
| 6    | Wild-type       | 22.5              | 7681.4        | 7581.8  | 30725.6               | 30327.9 |                |         | 0.8    | 0.9 | 0.9       |

| Lane | Sample          | Protein mass (µg) | Signal (area) |         | Signal x protein mass |         | Mean WT signal |         | Factor |     | ABCA4/VCL |
|------|-----------------|-------------------|---------------|---------|-----------------------|---------|----------------|---------|--------|-----|-----------|
|      |                 |                   | ABCA4         | VCL     | ABCA4                 | VCL     | ABCA4          | VCL     | ABCA4  | VCL |           |
| 1    | STGD1 untreated | 85                | 0             | 8455.5  | 0                     | 8952.9  | 28982.9        | 20984.8 | 0      | 0.4 | 0         |
| 2    | STGD1 scrambled | 85                | 0             | 10975.2 | 0                     | 11620.8 |                |         | 0      | 0.6 | 0         |
| 3    | STGD1 QR-1011   | 85                | 5462.5        | 17086.4 | 5783.8                | 18091.4 |                |         | 0.2    | 0.9 | 0.2       |
| 4    | Wild-type       | 90                | 26324.3       | 18773.1 | 26324.3               | 18773.1 |                |         | 0.9    | 0.9 | 1         |
| 5    | Wild-type       | 45                | 15236.5       | 9714.9  | 30473                 | 19429.9 |                |         | 1.5    | 0.9 | 1.1       |
| 6    | Wild-type       | 22.5              | 7537.9        | 6187.8  | 30151.5               | 24751.3 |                |         | 1      | 1.2 | 0.9       |

| Lane | Sample          | Protein mass (µg) | Signal (area) |         | Signal x protein mass |         | Mean WT signal |         | Factor |     | ABCA4/VCL |
|------|-----------------|-------------------|---------------|---------|-----------------------|---------|----------------|---------|--------|-----|-----------|
|      |                 |                   | ABCA4         | VCL     | ABCA4                 | VCL     | ABCA4          | VCL     | ABCA4  | VCL |           |
| 1    | STGD1 untreated | 85                | 0             | 7083.2  | 0                     | 7499.9  | 31148.1        | 21941.4 | 0      | 0.3 | 0         |
| 2    | STGD1 scrambled | 85                | 0             | 11958.3 | 0                     | 12661.7 |                |         | 0      | 0.6 | 0         |
| 3    | STGD1 QR-1011   | 85                | 6895.1        | 14844   | 7300.6                | 15717.1 |                |         | 0.2    | 0.7 | 0.3       |
| 4    | Wild-type       | 90                | 25998.6       | 15454.6 | 25998.6               | 15454.6 |                |         | 0.8    | 0.7 | 1.2       |
| 5    | Wild-type       | 45                | 15142.9       | 11816.4 | 30285.8               | 23632.9 |                |         | 1      | 1.1 | 0.9       |
| 6    | Wild-type       | 22.5              | 9290          | 6684.2  | 37159.8               | 26736.6 |                |         | 1.2    | 1.2 | 1         |

**Table S6.** Primer/probe list.

| <b>Target</b>                                                   | <b>Used for</b> | <b>Sequence (5'- 3')</b>                     |
|-----------------------------------------------------------------|-----------------|----------------------------------------------|
| <i>ABCA4</i> intron 37                                          | Midigene        | GGTGGTGAATTCCCATGTGAACTGGCCAAGAG (FW)        |
| <i>ABCA4</i> intron 41                                          | Midigene        | TGCTTAGTCGACGAGAGCAAGGAGGGGAAGAG (RV)        |
| <i>RHO</i> ex3 - <i>RHO</i> ex5<br>( <i>ABCA4</i> exon 39 skip) | Minigene        | TACATGTTTCGTGGTCCACTTC (FW)                  |
|                                                                 |                 | GCAGATGGTGGTGAGCAT (RV)                      |
|                                                                 |                 | /56-FAM/ACCGTCAAG/ZEN/GAGTTCGGAACTG/3IABkFQ/ |
| <i>ABCA4</i> exon 39 inclusion                                  | Minigene        | TACATGTTTCGTGGTCCACTTC (FW)                  |
|                                                                 |                 | GAAGACAATGAGCAGCTTCCT (RV)                   |
|                                                                 |                 | /56-FAM/AACGCTGCT/ZEN/CAGGTTCAACGC/3IABkFQ/  |
| <i>ABCA4</i> exons 39-40 skip                                   | Midigene/ROs    | GCGGTCATTCCCATGATGTA (FW)                    |
|                                                                 |                 | AACAATGGGCTCCTTAGTGG (RV)                    |
|                                                                 |                 | 5HEX/AATAACCGG/ZEN/GATTGCCGAGCT/3IABkFQ      |
| <i>ABCA4</i> exon 39 skip                                       | Midigene/ROs    | GCGGTCATTCCCATGATGTA (FW)                    |
|                                                                 |                 | AACAATGGGCTCCTTAGTGG (RV)                    |
|                                                                 |                 | /56-FAM/AATAACCGG/ZEN/GTGAGGAGCAC/3IABkFQ/   |
| <i>ABCA4</i> wild-type<br>(exons 39-40)                         | Midigene/ROs    | GAGAATAACCGGACGCTGCT (FW)                    |
|                                                                 |                 | ACCACCATGGCAAACAGGTTC (RV)                   |
|                                                                 |                 | /56-FAM/CCCGTTTTG/ZEN/GTGAGGAGCAC/3IABkFQ/   |
| <i>OPN1MW</i>                                                   | ROs             | GCCACCCTATGTGTGTCC (FW)                      |
|                                                                 |                 | GCTGTCCACACAGCAGCC (RV)                      |
|                                                                 |                 | /5HEX/AGAAGGCAA/ZEN/TGCCACGATGGC/3IABkFQ/    |
| <i>CRX</i>                                                      | ROs             | TTTGCCAAGACCCAGTACCC (FW)                    |
|                                                                 |                 | TTTAGCCCTCCGGTTCTTGA (RV)                    |
|                                                                 |                 | 56-FAM/ATGCCCGTG/ZEN/AGGAGGTGGCT/3IABkFQ/    |
| <i>RHO</i>                                                      | ROs             | TCATGATGAACAAGCAGTTCC (FW)                   |
|                                                                 |                 | GTCTTGGACACGGTAGCAGA (RV)                    |
|                                                                 |                 | /5HEX/CATCTGCTGCGGCAAGAACCC/3IABkFQ/         |

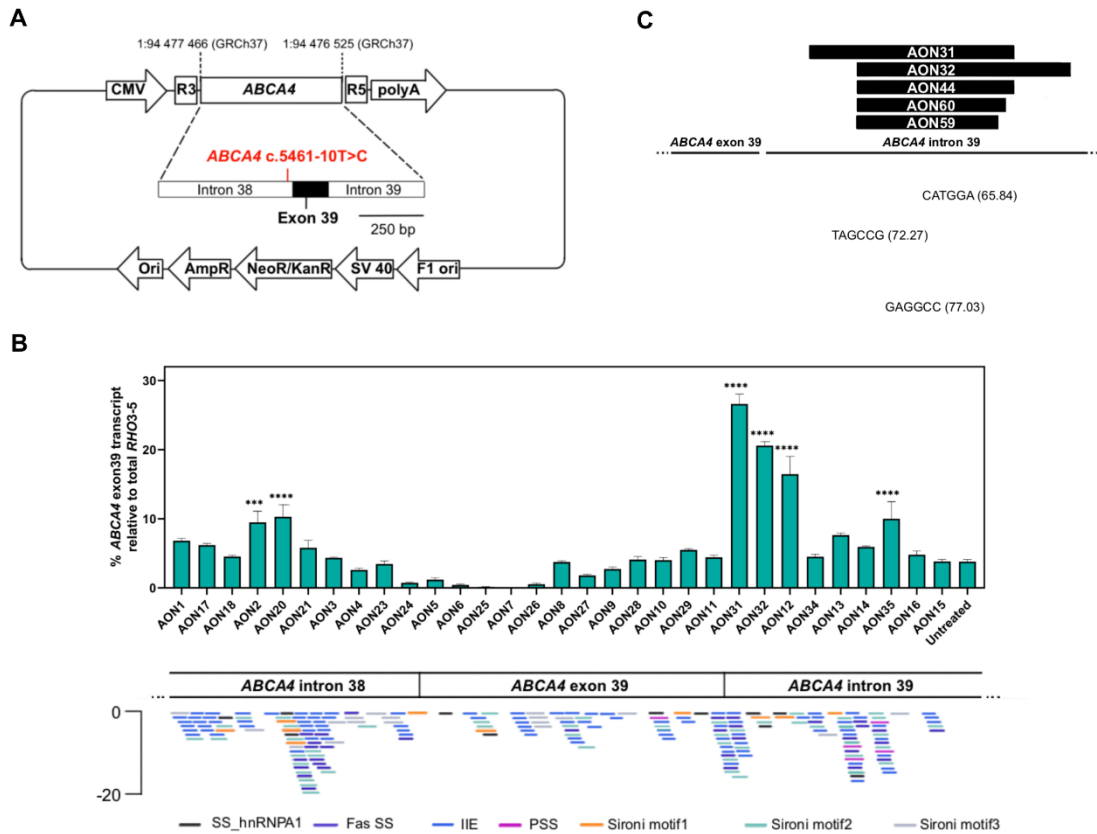

**Figure S1. Screening in minigene-transfected HEK293 cells identifies target region with strong intronic splicing silencers.** (A) Schematic representation of the minigene construct showing the *ABCA4* exon 39 flanked by parts of adjacent introns. (B) Splice rescue in the first AON screening on minigene-transfected cells. (n=2). Below are displayed the binding sites for RNA-splicing proteins (adapted from Human Splicing Finder).<sup>1</sup> \*\*\*p≤0.001, \*\*\*\*p≤0.0001. The details of each binding site can be found in Table S2. (C) Lead candidates AON31 and AON32 and their shorter versions AON44, AON60 and AON59 are complementary to the intron 39 region where three strong splicing silencer motifs are located that are involved in the recruitment of the splicing protein heterogeneous nuclear ribonucleoprotein A1 (hnRNP A1).



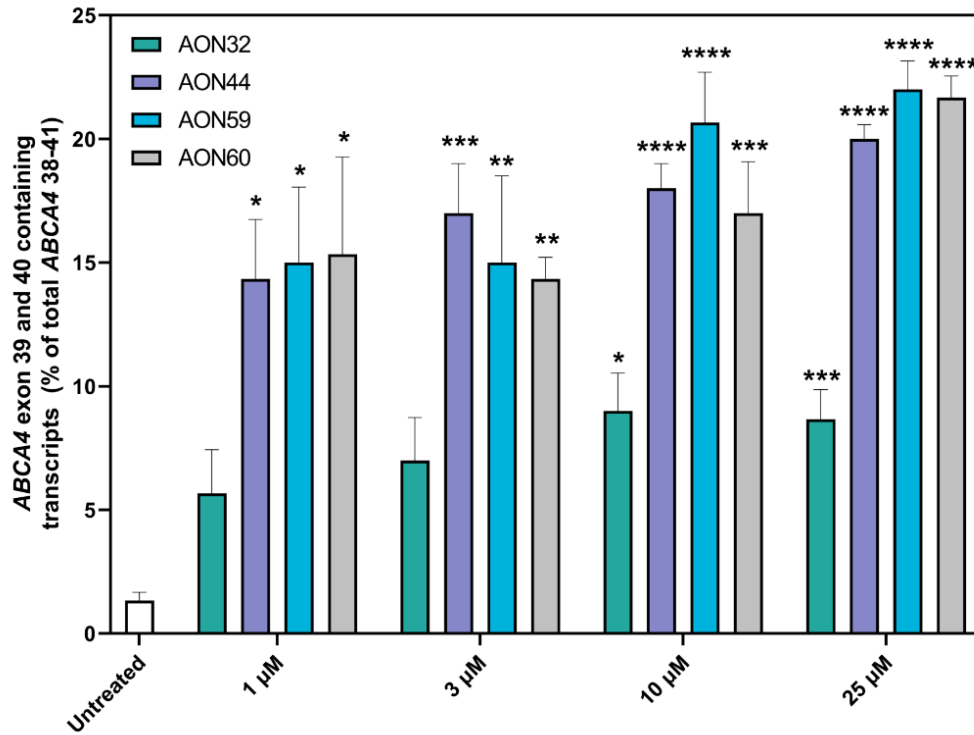

**Figure S2. Shorter AONs are more effective.** RNA analysis of midigene-transfected HEK293 cells treated gymnotically for 120 hours with best selected AONs. AON32 served as control since it consists in the long version of other selected. Data are shown as mean±s.e.m., n=3. All samples were compared to the untreated sample, \*p≤0.05, \*\*p≤0.01, \*\*\*p≤0.001, \*\*\*\*p≤0.0001.

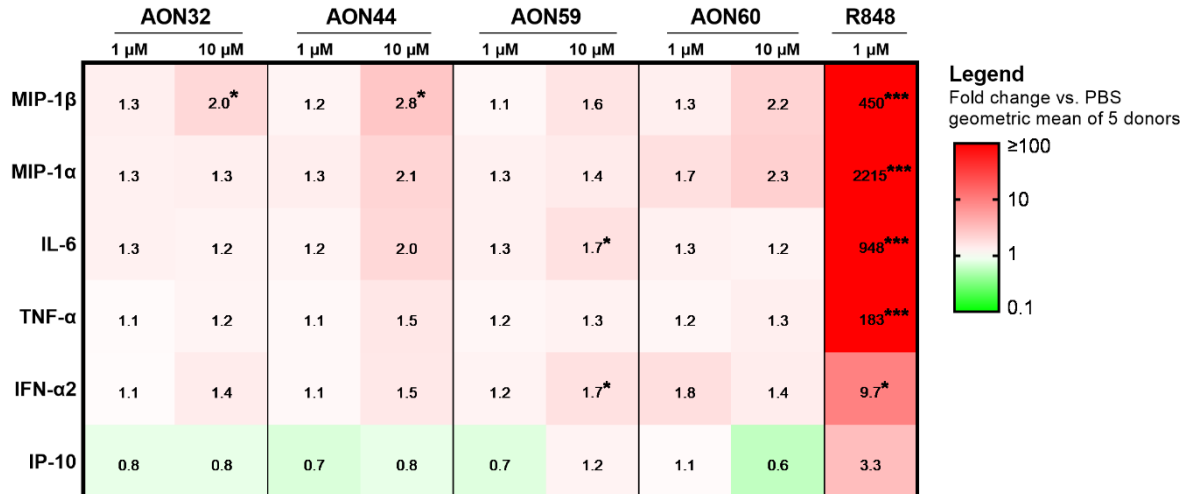

**Figure S3. Immunostimulatory analysis of lead AON candidates reveals their slight influence on cytokine secretion.** The heatmap depicts the fold change levels of cytokine concentrations in culture supernatant after 48-hour exposure to lead AON candidates or positive control R848 as compared to PBS-treated human peripheral blood mononuclear cells. Statistical testing was performed on log-transformed concentration values using mixed-model analysis, applying Dunnett’s correction for multiplicity. Statistically significant differences vs. PBS were annotated with \* $p < 0.05$ , \*\* $p < 0.01$ , \*\*\* $p < 0.001$ .

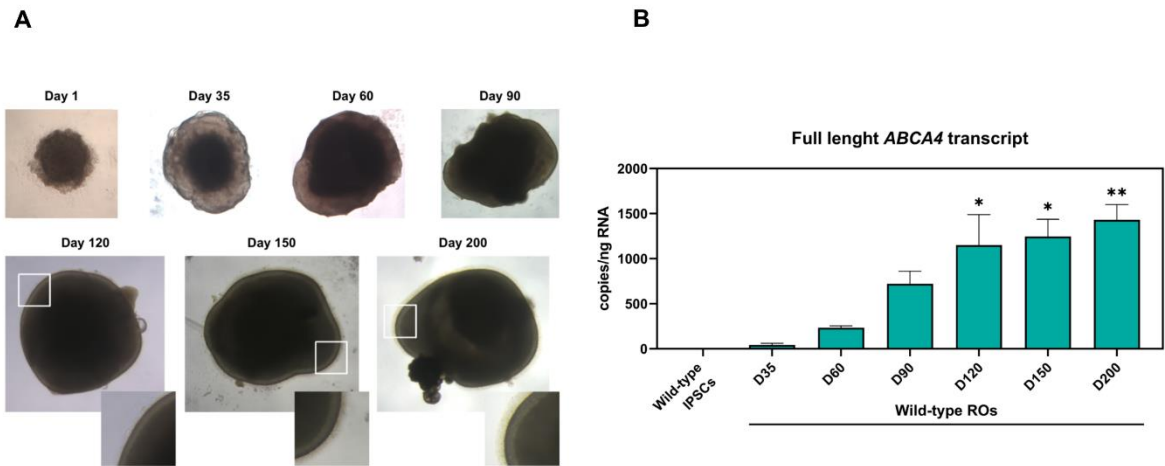

**Figure S4. Morphological and *ABCA4* transcript analysis of wild-type ROs over time.** (A) Control wild-type ROs were generated from control iPSCs that were the parent isogenic line for generation of gene edited homozygous *ABCA4* c.5461-10T>C iPSCs.<sup>35</sup> The iPSC appears as an embryoid body already at day 1 that develops into an organoid with dark core and sharp edges (day 35). The development of the neural retina was observed at day 90, and by day 120, the organoids were surrounded by a brush border that contains the inner and outer segments of photoreceptor cells. (B) The isoform analysis detected *ABCA4* transcripts only 35 days after organoid differentiation; the *ABCA4* expression increased at day 60 and 90 to 120, after which the expression is significantly higher over the expression detected in iPSCs. Moreover, 120 days after differentiation the expression of *ABCA4* remained relatively constant. Data are shown as mean±s.e.m., n=6. Statistically significant differences vs. wild-type iPSCs were annotated with \*p≤0.05, \*\*p≤0.01.

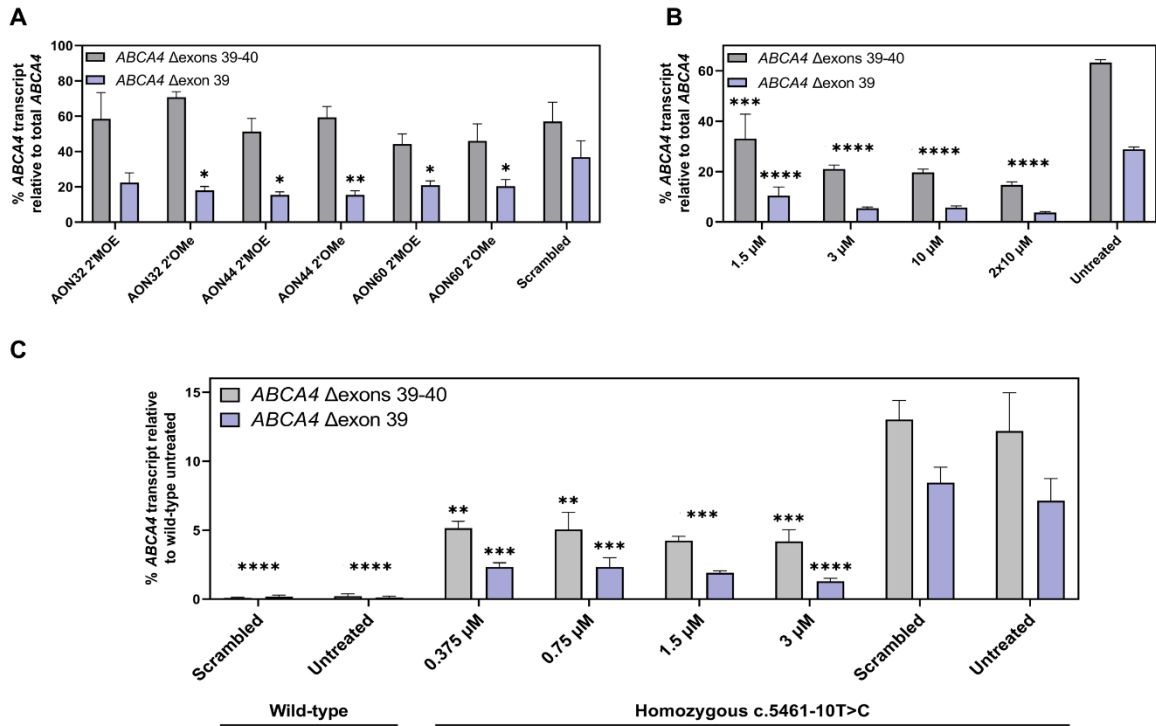

**Figure S5 . AON treatments exhibit suppression of both truncated isoforms in ROs. (A)**

Percentages of single skip and double skip *ABCA4* isoforms in the organoid study described in

Figure 4A, (B) Figure 4B and (C) Figure 5A. Data are shown as mean  $\pm$  s.e.m. Statistically

significant differences vs. untreated or scrambled were reported as \* $p \leq 0.05$ , \*\* $p \leq 0.01$ ,

\*\*\* $p \leq 0.001$ , \*\*\*\* $p \leq 0.0001$ ,  $n=6$ .

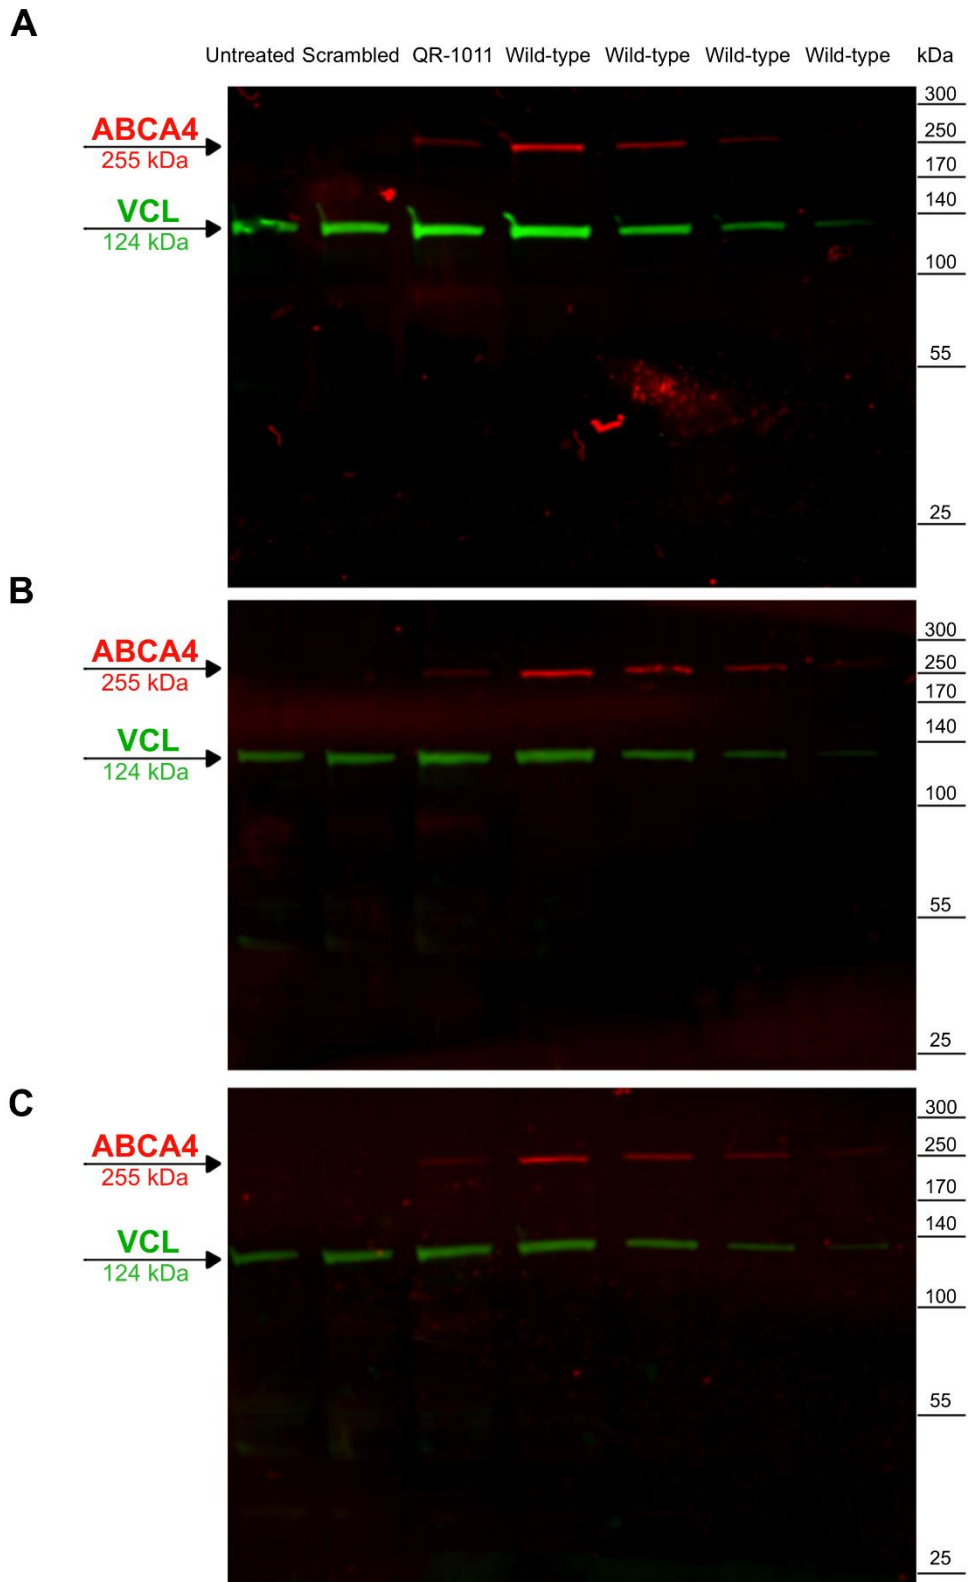

**Figure S6. QR-1011 restores translation of wild-type ABCA4 in patient-derived ROs.** Raw western blot data for the quantitative analysis (n=3) of protein lysates from patient-derived ROs treated with a 3  $\mu$ M dose of QR-1011 and wild-type ROs (Figure 5B). Quantification details can be found in Table S5.

## ***REFERENCES***

1. Desmet, F.O., Hamroun, D., Lalande, M., Collod-Beroud, G., Claustres, M. and Beroud, C. (2009). Human Splicing Finder: an online bioinformatics tool to predict splicing signals. *Nucleic Acids Res.* 37, e67. <https://doi.org/10.1093/nar/gkp215>.
